# Supplementary material for: Influence of Self‐Perceived Burden on Quality of Life in Patients with Urostomy Based on Structural Equation Model: The Mediating Effects of Resilience and Social Support
Source: Hindawi journal article supplement (doi:10.1155/2022/9724751), 2022-01-01
Supplement: f1 [file 9724751.f1.pdf]

**Ethical Clearance Certificate of Ningxia Medical University General Hospital Scientific Research Ethics Committee**

|                                                                                                                                                                                                                                                                                                              |                                                                                                                |                             |                    |
|--------------------------------------------------------------------------------------------------------------------------------------------------------------------------------------------------------------------------------------------------------------------------------------------------------------|----------------------------------------------------------------------------------------------------------------|-----------------------------|--------------------|
| <b>Project name:</b>                                                                                                                                                                                                                                                                                         | Study on Correlation among the Self-perceived Burden, Quality of Life and Resilience in Patients with Urostomy | <b>Ethics number:</b>       | 2020-643           |
| <b>Project leader:</b>                                                                                                                                                                                                                                                                                       | Lu Hongyan                                                                                                     | <b>Professional titles:</b> | chief nurse        |
| <b>Phone number:</b>                                                                                                                                                                                                                                                                                         | 13619504803                                                                                                    | <b>Department:</b>          | Nursing Department |
| <b>Research unit responsible for the project:</b> Ningxia Medical University General Hospital                                                                                                                                                                                                                |                                                                                                                |                             |                    |
| <b>Cooperative research unit:</b><br>None                                                                                                                                                                                                                                                                    |                                                                                                                |                             |                    |
| <b>Date:</b> From 2020-04-01 To 2021-06-30                                                                                                                                                                                                                                                                   |                                                                                                                |                             |                    |
| <b>Sources for research projects:</b><br>Autonomy                                                                                                                                                                                                                                                            |                                                                                                                |                             |                    |
| <b>Longitudinal Study (Government support)</b><br><input type="checkbox"/> Association / Foundation <input type="checkbox"/> Company <input type="checkbox"/> Horizontal cooperation <input type="checkbox"/> Multicenter Study <input checked="" type="checkbox"/> Autonomy <input type="checkbox"/> Others |                                                                                                                |                             |                    |
| <b>Research funding unit:</b><br>Other                                                                                                                                                                                                                                                                       |                                                                                                                |                             |                    |
| <b>Subjects:</b> <input type="checkbox"/> Animals <input type="checkbox"/> Cells <input type="checkbox"/> Imaging Data <input checked="" type="checkbox"/> Human Specimens and Samples                                                                                                                       |                                                                                                                |                             |                    |
| <b>Reviewing opinions :</b>                                                                                                                                                                                                                                                                                  |                                                                                                                |                             |                    |
| <input type="checkbox"/> This study comply with ethical requirements, and can be tested according to this scheme.<br><input type="checkbox"/> This study does not comply with ethical requirements. Please revise the application before ethics committee review it again.                                   |                                                                                                                |                             |                    |
| Do you have patient consent form? <input type="radio"/> Yes <input type="radio"/> No                                                                                                                                                                                                                         |                                                                                                                |                             |                    |
| Whether the methods of obtaining patient consent were appropriate: <input type="radio"/> Inappropriate <input type="radio"/> Appropriate                                                                                                                                                                     |                                                                                                                |                             |                    |
| Ningxia Medical University General Hospital<br>Scientific Research Ethics Committee                                                                                                                                                                                                                          |                                                                                                                |                             |                    |
| <p><i>agree!</i></p> <p><i>Wei Zhao      Yanrong Wang      Bao zhen Yang</i></p> <p><i>Xiaoyun Ding      Fanqin Yang</i></p> <p><i>Hongwan Dang      Yulin Guo</i></p>                                                                                                                                       |                                                                                                                |                             |                    |
